# Supplementary material
Source: PubMed Central journal article supplement (PMC6397626)
Supplement: NIHMS1004569-supplement-supporting.pdf [file NIHMS1004569-supplement-supporting.pdf]

## SUPPLEMENTARY FIGURE 1

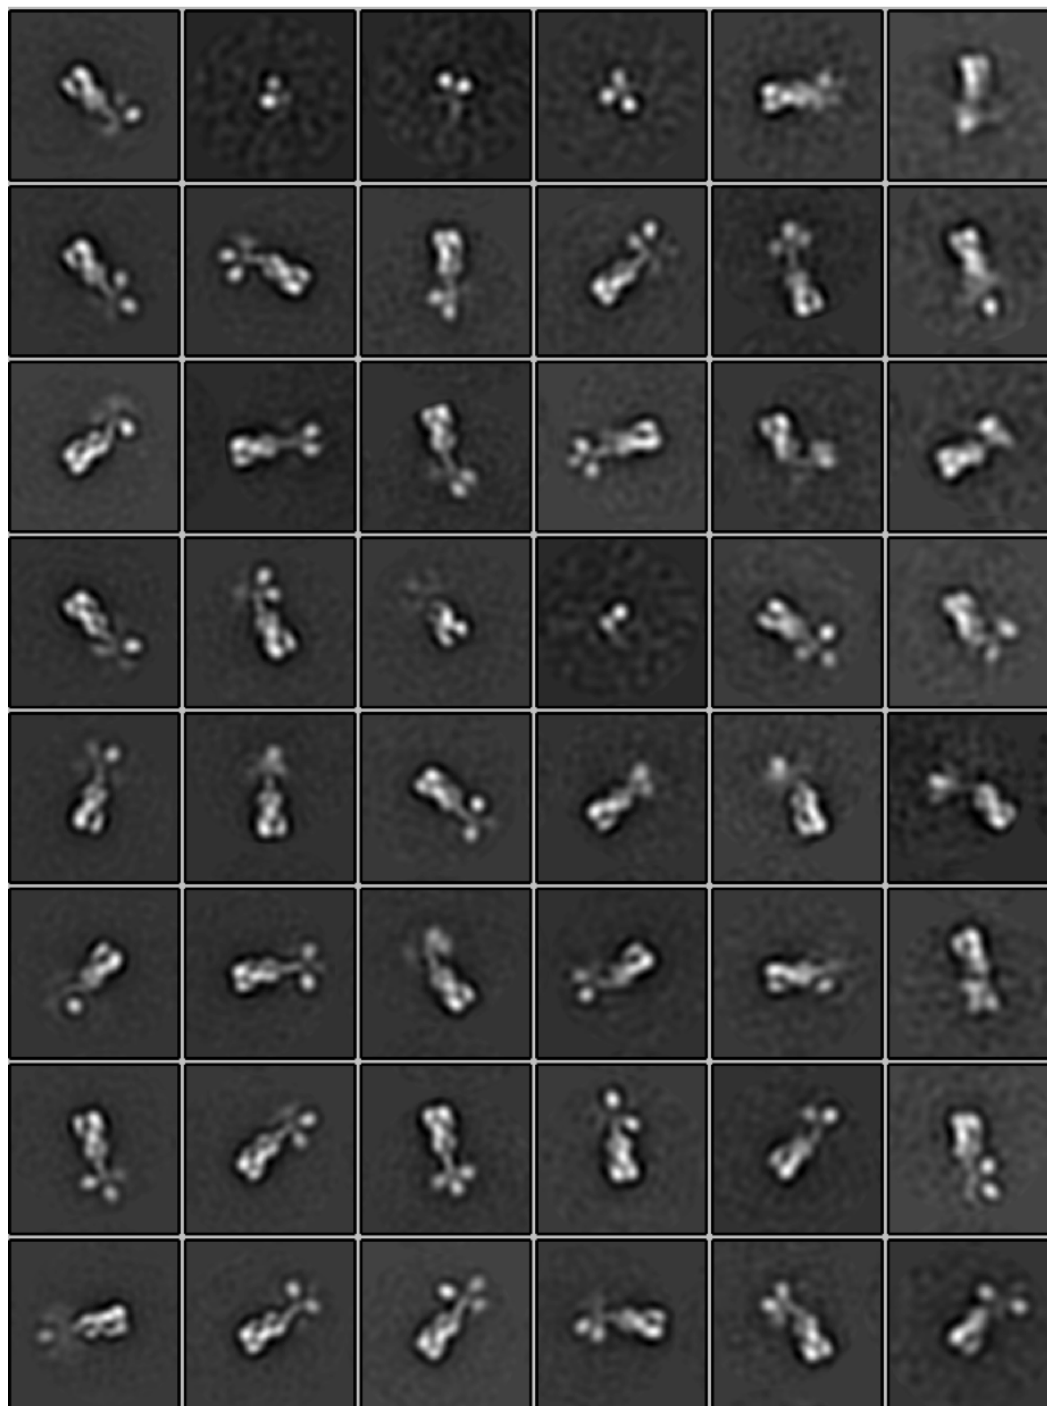

All of the reference free 2D class averages contain the C-terminal GFP at the base of the HA trimer.

1 **SUPPLEMENTARY FIGURE 2.**

2

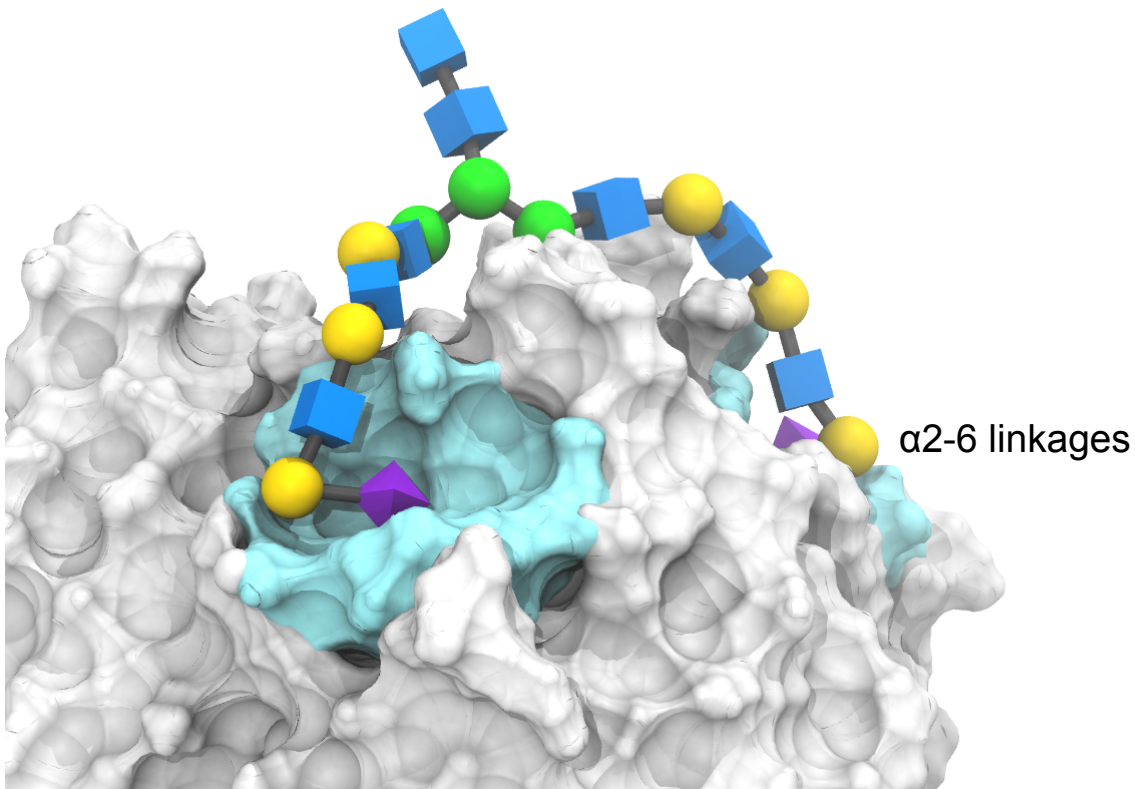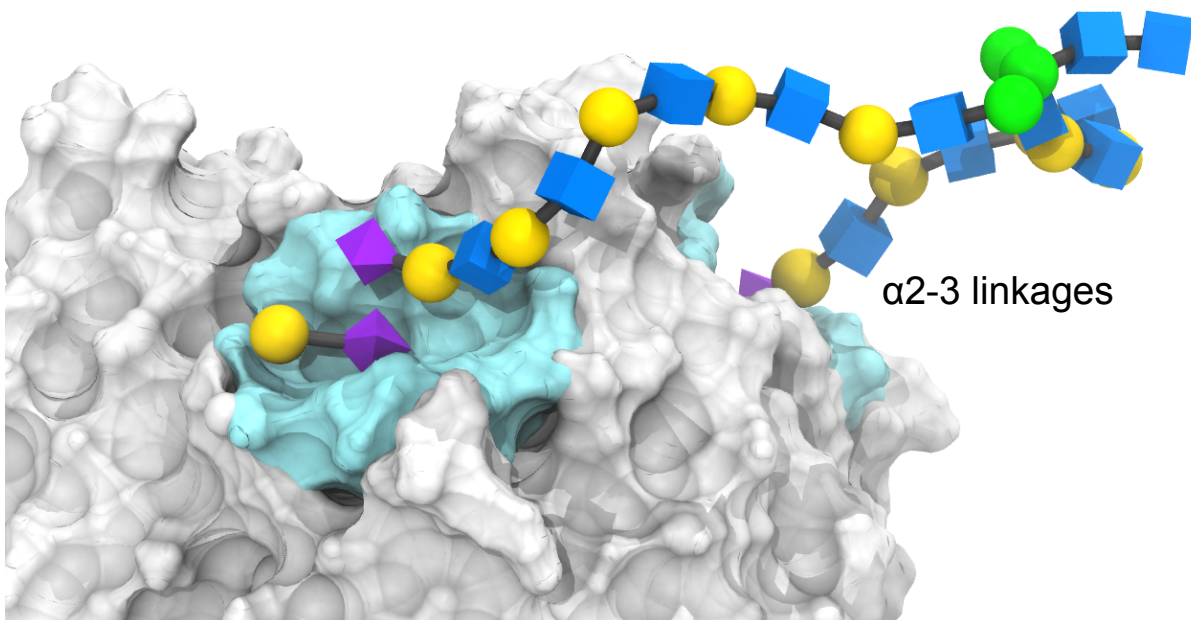

3

4 In previous work, a 3D structure of an  $\alpha 2-6$  biantennary N-glycan with three lacNAc  
5 repeats was produced in a bidentate co-complex with HA (**Upper Panel**). This was

1 modeled by first superimposing the terminal disaccharide onto a disaccharide in a crystal  
2 structure co-complex. Then the glycosidic linkages were adjusted within their low energy  
3 ranges and dihedral angles were selected that brought the second, unbound motif towards  
4 a second binding site. The binding motif was pulled into position during an all-atom  
5 molecular dynamics simulation and finally, the restraints were released to determine if the  
6 structure was stable. This method produced a bidentate co-complex for  $\alpha$ 2-6 biantennary  
7 N-glycan with three, four or five lacNAc repeats. In contrast, this method did not find  
8 bidentate N-glycans with  $\alpha$ 2-3 linkages. Although N-glycans containing  $\alpha$ 2-3 linkages and  
9 five lacNAc repeats could span both sites (Lower panel), the  $\alpha$ 2-3 linkage places the motif  
10 in the opposite orientation required by the binding site.

11
