# Supplementary material
Source: PubMed Central journal article supplement (PMC6397626)
Supplement: NIHMS1004569-supplement-Table_S1.pdf [file NIHMS1004569-supplement-Table_S1.pdf]

| Glycan # | Common Name                                                                                                                                                                                                                                                        | Structure                                                                             |
|----------|--------------------------------------------------------------------------------------------------------------------------------------------------------------------------------------------------------------------------------------------------------------------|---------------------------------------------------------------------------------------|
| 1        | Gal $\beta$ (1-4)GlcNAc $\beta$ -ethyl-NH <sub>2</sub>                                                                                                                                                                                                             |    |
| 2        | Gal $\beta$ (1-4)GlcNAc $\beta$ (1-3)Gal $\beta$ (1-3)GalNAc $\alpha$ -Thr-NH <sub>2</sub>                                                                                                                                                                         |    |
| 3        | Gal $\beta$ (1-4)GlcNAc $\beta$ (1-6)[Gal $\beta$ (1-3)]-GalNAc $\alpha$ -Thr-NH <sub>2</sub>                                                                                                                                                                      |    |
| 4        | Gal $\beta$ (1-4)GlcNAc $\beta$ (1-3)GalNAc $\alpha$ -Thr-NH <sub>2</sub>                                                                                                                                                                                          |    |
| 5        | Gal $\beta$ (1-4)GlcNAc $\beta$ (1-3)[Gal $\beta$ (1-4)GlcNAc $\beta$ (1-6)]-GalNAc $\alpha$ -Thr-NH <sub>2</sub>                                                                                                                                                  |    |
| 6        | Gal $\beta$ (1-4)GlcNAc $\beta$ (1-6)GalNAc $\alpha$ -Thr-NH <sub>2</sub>                                                                                                                                                                                          |    |
| 7        | Gal $\beta$ (1-4)GlcNAc $\beta$ (1-2)Man $\alpha$ (1-3)[Gal $\beta$ (1-4)GlcNAc $\beta$ (1-2)Man $\alpha$ (1-6)]-Man $\beta$ (1-4)GlcNAc $\beta$ (1-4)GlcNAc $\beta$ -Asn-NH <sub>2</sub>                                                                          |   |
| 8        | Gal $\beta$ (1-4)GlcNAc $\beta$ (1-2)Man $\alpha$ (1-3)[Gal $\beta$ (1-4)GlcNAc $\beta$ (1-2)Man $\alpha$ (1-6)]-Man $\beta$ (1-4)GlcNAc $\beta$ (1-4)[Fuca(1-6)]-GlcNAc $\beta$ -Asn-Ser-Thr-NH <sub>2</sub>                                                      |  |
| 9        | Gal $\beta$ (1-4)GlcNAc $\beta$ (1-2)Man $\alpha$ (1-3){Gal $\beta$ (1-4)GlcNAc $\beta$ (1-2)[Gal $\beta$ (1-4)GlcNAc $\beta$ (1-2)]-Man $\alpha$ (1-6)}-Man $\beta$ (1-4)GlcNAc $\beta$ (1-4)GlcNAc $\beta$ -Asn-Lys-NH <sub>2</sub>                              |  |
| 10       | Gal $\beta$ (1-4)GlcNAc $\beta$ (1-2)Man $\alpha$ (1-3){Gal $\beta$ (1-4)GlcNAc $\beta$ (1-2)[Gal $\beta$ (1-4)GlcNAc $\beta$ (1-2)]-Man $\alpha$ (1-6)}-Man $\beta$ (1-4)GlcNAc $\beta$ (1-4)[Fuca(1-6)]-GlcNAc $\beta$ -(Lys-Val-Ala)Asn-Lys-Thr-NH <sub>2</sub> |  |
| 11       | NeuAc $\alpha$ (2-3)Gal $\beta$ (1-4)6-O-sulfo-GlcNAc $\beta$ -propyl-NH <sub>2</sub>                                                                                                                                                                              |  |

|    |                                                                                                                                                      |                                                                                       |
|----|------------------------------------------------------------------------------------------------------------------------------------------------------|---------------------------------------------------------------------------------------|
| 12 | NeuAc $\alpha$ (2-3)Gal $\beta$ (1-4)[Fuc $\alpha$ (1-3)]-6-O-sulfo-GlcNAc $\beta$ -propyl-NH <sub>2</sub>                                           | 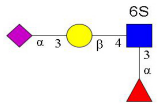   |
| 13 | NeuAc $\alpha$ (2-3)6-O-sulfo-Gal $\beta$ (1-4)GlcNAc $\beta$ -ethyl-NH <sub>2</sub>                                                                 |    |
| 14 | NeuAc $\alpha$ (2-3)6-O-sulfo-Gal $\beta$ (1-4)[Fuc $\alpha$ (1-3)]-GlcNAc $\beta$ -propyl-NH <sub>2</sub>                                           |    |
| 15 | NeuAc $\alpha$ (2-3)Gal $\beta$ (1-3)6-O-sulfo-GlcNAc $\beta$ -propyl-NH <sub>2</sub>                                                                |    |
| 16 | NeuAc $\alpha$ (2-3)Gal $\beta$ (1-4)Glc $\beta$ -ethyl-NH <sub>2</sub>                                                                              |    |
| 17 | NeuAc $\alpha$ (2-3)Gal $\beta$ (1-4)GlcNAc $\beta$ -ethyl-NH <sub>2</sub>                                                                           |    |
| 18 | NeuAc $\alpha$ (2-3)Gal $\beta$ (1-4)GlcNAc $\beta$ (1-3)Gal $\beta$ (1-4)GlcNAc $\beta$ -ethyl-NH <sub>2</sub>                                      |   |
| 19 | NeuAc $\alpha$ (2-3)Gal $\beta$ (1-4)GlcNAc $\beta$ (1-3)Gal $\beta$ (1-4)GlcNAc $\beta$ (1-3)Gal $\beta$ (1-4)GlcNAc $\beta$ -ethyl-NH <sub>2</sub> |  |
| 20 | NeuAc $\alpha$ (2-3)GalNAc $\beta$ (1-4)GlcNAc $\beta$ -ethyl-NH <sub>2</sub>                                                                        |  |
| 21 | NeuAc $\alpha$ (2-3)Gal $\beta$ (1-3)GlcNAc $\beta$ -ethyl-NH <sub>2</sub>                                                                           |  |
| 22 | NeuAc $\alpha$ (2-3)Gal $\beta$ (1-3)GlcNAc $\beta$ (1-3)Gal $\beta$ (1-4)GlcNAc $\beta$ -ethyl-NH <sub>2</sub>                                      |  |
| 23 | NeuAc $\alpha$ (2-3)Gal $\beta$ (1-3)GlcNAc $\beta$ (1-3)Gal $\beta$ (1-3)GlcNAc $\beta$ -ethyl-NH <sub>2</sub>                                      |  |
| 24 | NeuAc $\alpha$ (2-3)Gal $\beta$ (1-3)GalNAc $\beta$ (1-3)Gala(1-4)Gal $\beta$ (1-4)Glc $\beta$ -ethyl-NH <sub>2</sub>                                |  |
| 25 | NeuAc $\alpha$ (2-3)Gal $\beta$ (1-3)GalNAc $\alpha$ -Thr-NH <sub>2</sub>                                                                            |  |

|    |                                                                                                                                                                                                                                                                       |  |
|----|-----------------------------------------------------------------------------------------------------------------------------------------------------------------------------------------------------------------------------------------------------------------------|--|
| 26 | NeuAc $\alpha$ (2-3)Gal $\beta$ (1-4)GlcNAc $\beta$ (1-3)Gal $\beta$ (1-3)GalNAc $\alpha$ -Thr-NH <sub>2</sub>                                                                                                                                                        |  |
| 27 | NeuAc $\alpha$ (2-3)Gal $\beta$ (1-4)GlcNAc $\beta$ (1-3)Gal $\beta$ (1-4)GlcNAc $\beta$ (1-3)Gal $\beta$ (1-3)GalNAc $\alpha$ -Thr-NH <sub>2</sub>                                                                                                                   |  |
| 28 | NeuAc $\alpha$ (2-3)Gal $\beta$ (1-4)GlcNAc $\beta$ (1-3)Gal $\beta$ (1-4)GlcNAc $\beta$ (1-3)Gal $\beta$ (1-4)GlcNAc $\beta$ (1-3)Gal $\beta$ (1-3)GalNAc $\alpha$ -Thr-NH <sub>2</sub>                                                                              |  |
| 29 | NeuAc $\alpha$ (2-3)Gal $\beta$ (1-4)GlcNAc $\beta$ (1-3)Gal $\beta$ (1-4)GlcNAc $\beta$ (1-3)Gal $\beta$ (1-4)GlcNAc $\beta$ (1-3)Gal $\beta$ (1-4)GlcNAc $\beta$ (1-3)Gal $\beta$ (1-3)GalNAc $\alpha$ -Thr-NH <sub>2</sub>                                         |  |
| 30 | NeuAc $\alpha$ (2-3)Gal $\beta$ (1-4)GlcNAc $\beta$ (1-3)Gal $\beta$ (1-3)GalNAc $\alpha$ -Thr-NH <sub>2</sub>    |  |
| 31 | NeuAc $\alpha$ (2-3)Gal $\beta$ (1-4)GlcNAc $\beta$ (1-6)[Gal $\beta$ (1-3)]-GalNAc $\alpha$ -Thr-NH <sub>2</sub>                                                                                                                                                     |  |
| 32 | NeuAc $\alpha$ (2-3)Gal $\beta$ (1-4)GlcNAc $\beta$ (1-3)Gal $\beta$ (1-4)GlcNAc $\beta$ (1-6)[Gal $\beta$ (1-3)]-GalNAc $\alpha$ -Thr-NH <sub>2</sub>                                                                                                                |  |
| 33 | NeuAc $\alpha$ (2-3)Gal $\beta$ (1-4)GlcNAc $\beta$ (1-3)Gal $\beta$ (1-4)GlcNAc $\beta$ (1-3)Gal $\beta$ (1-4)GlcNAc $\beta$ (1-3)Gal $\beta$ (1-4)GlcNAc $\beta$ (1-6)[Gal $\beta$ (1-3)]-GalNAc $\alpha$ -Thr-NH <sub>2</sub>                                      |  |
| 34 | NeuAc $\alpha$ (2-3)Gal $\beta$ (1-4)GlcNAc $\beta$ (1-3)Gal $\beta$ (1-4)GlcNAc $\beta$ (1-3)Gal $\beta$ (1-4)GlcNAc $\beta$ (1-3)Gal $\beta$ (1-4)GlcNAc $\beta$ (1-6)[Gal $\beta$ (1-3)]-GalNAc $\alpha$ -Thr-NH <sub>2</sub>                                      |  |
| 35 | NeuAc $\alpha$ (2-3)Gal $\beta$ (1-4)GlcNAc $\beta$ (1-3)Gal $\beta$ (1-4)GlcNAc $\beta$ (1-3)Gal $\beta$ (1-4)GlcNAc $\beta$ (1-3)Gal $\beta$ (1-4)GlcNAc $\beta$ (1-3)Gal $\beta$ (1-4)GlcNAc $\beta$ (1-6)[Gal $\beta$ (1-3)]-GalNAc $\alpha$ -Thr-NH <sub>2</sub> |  |



|    |                                                                                                                                                                                                                                                                                                                                                                                                                                                                                                                                                                                                                                                                                                                 |  |
|----|-----------------------------------------------------------------------------------------------------------------------------------------------------------------------------------------------------------------------------------------------------------------------------------------------------------------------------------------------------------------------------------------------------------------------------------------------------------------------------------------------------------------------------------------------------------------------------------------------------------------------------------------------------------------------------------------------------------------|--|
| 46 | <p>NeuAc<math>\alpha</math>(2-3)Gal<math>\beta</math>(1-4)GlcNAc<math>\beta</math>(1-3)Gal<math>\beta</math>(1-4)GlcNAc<math>\beta</math>(1-3)Gal<math>\beta</math>(1-4)GlcNAc<math>\beta</math>(1-3)Gal<math>\beta</math>(1-4)GlcNAc<math>\beta</math>(1-3)Gal<math>\beta</math>(1-4)GlcNAc<math>\beta</math>(1-3)Gal<math>\beta</math>(1-4)GlcNAc<math>\beta</math>(1-3)Gal<math>\beta</math>(1-4)GlcNAc<math>\beta</math>(1-3)Gal<math>\beta</math>(1-4)GlcNAc<math>\beta</math>(1-3)Gal<math>\beta</math>(1-4)GlcNAc<math>\beta</math>(1-6)]-GalNAc<math>\alpha</math>-Thr-NH<sub>2</sub></p>                                                                                                               |  |
| 47 | <p>NeuAc<math>\alpha</math>(2-3)Gal<math>\beta</math>(1-4)GlcNAc<math>\beta</math>(1-3)Gal<math>\beta</math>(1-4)GlcNAc<math>\beta</math>(1-3)Gal<math>\beta</math>(1-4)GlcNAc<math>\beta</math>(1-3)Gal<math>\beta</math>(1-4)GlcNAc<math>\beta</math>(1-3)Gal<math>\beta</math>(1-4)GlcNAc<math>\beta</math>(1-3)Gal<math>\beta</math>(1-4)GlcNAc<math>\beta</math>(1-3)Gal<math>\beta</math>(1-4)GlcNAc<math>\beta</math>(1-3)Gal<math>\beta</math>(1-4)GlcNAc<math>\beta</math>(1-3)Gal<math>\beta</math>(1-4)GlcNAc<math>\beta</math>(1-3)Gal<math>\beta</math>(1-4)GlcNAc<math>\beta</math>(1-3)Gal<math>\beta</math>(1-4)GlcNAc<math>\beta</math>(1-6)]-GalNAc<math>\alpha</math>-Thr-NH<sub>2</sub></p> |  |
| 48 | <p>NeuAc<math>\alpha</math>(2-3)Gal<math>\beta</math>(1-4)GlcNAc<math>\beta</math>(1-3)Gal<math>\beta</math>(1-4)GlcNAc<math>\beta</math>(1-3)Gal<math>\beta</math>(1-4)GlcNAc<math>\beta</math>(1-3)Gal<math>\beta</math>(1-4)GlcNAc<math>\beta</math>(1-6)]GalNAc<math>\alpha</math>-Thr-NH<sub>2</sub></p>                                                                                                                                                                                                                                                                                                                                                                                                   |  |
| 49 | <p>NeuAc<math>\alpha</math>(2-3)Gal<math>\beta</math>(1-4)GlcNAc<math>\beta</math>(1-3)Gal<math>\beta</math>(1-4)GlcNAc<math>\beta</math>(1-3)Gal<math>\beta</math>(1-4)GlcNAc<math>\beta</math>(1-3)Gal<math>\beta</math>(1-4)GlcNAc<math>\beta</math>(1-3)Gal<math>\beta</math>(1-4)GlcNAc<math>\beta</math>(1-6)]GalNAc<math>\alpha</math>-Thr-NH<sub>2</sub></p>                                                                                                                                                                                                                                                                                                                                            |  |
| 50 | <p>NeuAc<math>\alpha</math>(2-3)Gal<math>\beta</math>(1-3)GlcNAc<math>\beta</math>(1-3)Gal<math>\beta</math>(1-4)GlcNAc<math>\beta</math>(1-6)]NeuAc<math>\alpha</math>(2-3)Gal<math>\beta</math>(1-3)GlcNAc<math>\beta</math>(1-3)]Gal<math>\beta</math>(1-4)GlcNAc<math>\beta</math>-ethyl-NH<sub>2</sub></p>                                                                                                                                                                                                                                                                                                                                                                                                 |  |
| 51 | <p>NeuAc<math>\alpha</math>(2-3)Gal<math>\beta</math>(1-4)GlcNAc<math>\beta</math>(1-3)Gal<math>\beta</math>(1-4)GlcNAc<math>\beta</math>(1-3)Gal<math>\beta</math>(1-4)GlcNAc<math>\beta</math>(1-6)]NeuAc<math>\alpha</math>(2-3)Gal<math>\beta</math>(1-4)GlcNAc<math>\beta</math>(1-3)Gal<math>\beta</math>(1-4)GlcNAc<math>\beta</math>(1-3)]Gal<math>\beta</math>(1-4)GlcNAc<math>\beta</math>-ethyl-NH<sub>2</sub></p>                                                                                                                                                                                                                                                                                   |  |
| 52 | <p>NeuAc<math>\alpha</math>(2-3)Gal<math>\beta</math>(1-4)GlcNAc<math>\beta</math>(1-2)Mana(1-3)]NeuAc<math>\alpha</math>(2-3)Gal<math>\beta</math>(1-4)GlcNAc<math>\beta</math>(1-2)Mana(1-6)]Man<math>\beta</math>(1-4)GlcNAc<math>\beta</math>(1-4)GlcNAc<math>\beta</math>-Asn-NH<sub>2</sub></p>                                                                                                                                                                                                                                                                                                                                                                                                           |  |
| 53 | <p>NeuAc<math>\alpha</math>(2-3)Gal<math>\beta</math>(1-4)GlcNAc<math>\beta</math>(1-3)Gal<math>\beta</math>(1-4)GlcNAc<math>\beta</math>(1-2)Mana(1-3)]NeuAc<math>\alpha</math>(2-3)Gal<math>\beta</math>(1-4)GlcNAc<math>\beta</math>(1-3)Gal<math>\beta</math>(1-4)GlcNAc<math>\beta</math>(1-2)Mana(1-6)]-Man<math>\beta</math>(1-4)GlcNAc<math>\beta</math>(1-4)GlcNAc<math>\beta</math>-Asn-NH<sub>2</sub></p>                                                                                                                                                                                                                                                                                            |  |
| 54 | <p>NeuAc<math>\alpha</math>(2-3)Gal<math>\beta</math>(1-4)GlcNAc<math>\beta</math>(1-3)Gal<math>\beta</math>(1-4)GlcNAc<math>\beta</math>(1-3)Gal<math>\beta</math>(1-4)GlcNAc<math>\beta</math>(1-3)Gal<math>\beta</math>(1-4)GlcNAc<math>\beta</math>(1-2)Mana(1-3)]NeuAc<math>\alpha</math>(2-3)Gal<math>\beta</math>(1-4)GlcNAc<math>\beta</math>(1-3)Gal<math>\beta</math>(1-4)GlcNAc<math>\beta</math>(1-3)Gal<math>\beta</math>(1-4)GlcNAc<math>\beta</math>(1-2)Mana(1-6)]-Man<math>\beta</math>(1-4)GlcNAc<math>\beta</math>(1-4)GlcNAc<math>\beta</math>-Asn-NH<sub>2</sub></p>                                                                                                                       |  |



|    |                                                                                                                                                                                                                                                                                                                                                                                                                                                                                                                                                                                                                                                                                                                                                                                                |  |
|----|------------------------------------------------------------------------------------------------------------------------------------------------------------------------------------------------------------------------------------------------------------------------------------------------------------------------------------------------------------------------------------------------------------------------------------------------------------------------------------------------------------------------------------------------------------------------------------------------------------------------------------------------------------------------------------------------------------------------------------------------------------------------------------------------|--|
| 62 | <p>NeuAc<math>\alpha</math>(2-3)Gal<math>\beta</math>(1-4)GlcNAc<math>\beta</math>(1-3)Gal<math>\beta</math>(1-4)GlcNAc<math>\beta</math>(1-3)Gal<math>\beta</math>(1-4)GlcNAc<math>\beta</math>(1-2)Man<math>\alpha</math>(1-3){NeuAc<math>\alpha</math>(2-3)Gal<math>\beta</math>(1-4)GlcNAc<math>\beta</math>(1-3)Gal<math>\beta</math>(1-4)GlcNAc<math>\beta</math>(1-3)Gal<math>\beta</math>(1-4)GlcNAc<math>\beta</math>(1-2)[NeuAc<math>\alpha</math>(2-3)Gal<math>\beta</math>(1-4)GlcNAc<math>\beta</math>(1-3)Gal<math>\beta</math>(1-4)GlcNAc<math>\beta</math>(1-3)Gal<math>\beta</math>(1-4)GlcNAc<math>\beta</math>(1-6)Man<math>\alpha</math>(1-6)]-Man<math>\beta</math>(1-4)GlcNAc<math>\beta</math>(1-4)GlcNAc<math>\beta</math>-(Lys-Val-Ala)Asn-Lys-Thr-NH<sub>2</sub></p> |  |
| 63 | <p>NeuAc<math>\alpha</math>(2-3)Gal<math>\beta</math>(1-4)GlcNAc<math>\beta</math>(1-3)Gal<math>\beta</math>(1-4)GlcNAc<math>\beta</math>(1-3)Gal<math>\beta</math>(1-4)GlcNAc<math>\beta</math>(1-2)Man<math>\alpha</math>(1-3){NeuAc<math>\alpha</math>(2-3)Gal<math>\beta</math>(1-4)GlcNAc<math>\beta</math>(1-3)Gal<math>\beta</math>(1-4)GlcNAc<math>\beta</math>(1-2)[NeuAc<math>\alpha</math>(2-3)Gal<math>\beta</math>(1-4)GlcNAc<math>\beta</math>(1-3)Gal<math>\beta</math>(1-4)GlcNAc<math>\beta</math>(1-3)Gal<math>\beta</math>(1-4)GlcNAc<math>\beta</math>(1-3)Gal<math>\beta</math>(1-4)GlcNAc<math>\beta</math>(1-6)Man<math>\alpha</math>(1-6)]-Man<math>\beta</math>(1-4)GlcNAc<math>\beta</math>(1-4)GlcNAc<math>\beta</math>-(Lys-Val-Ala)Asn-Lys-Thr-NH<sub>2</sub></p> |  |
| 64 | <p>NeuAc<math>\alpha</math>(2-3)Gal<math>\beta</math>(1-4)GlcNAc<math>\beta</math>(1-3)Gal<math>\beta</math>(1-4)GlcNAc<math>\beta</math>(1-2)Man<math>\alpha</math>(1-3){NeuAc<math>\alpha</math>(2-3)Gal<math>\beta</math>(1-4)GlcNAc<math>\beta</math>(1-3)Gal<math>\beta</math>(1-4)GlcNAc<math>\beta</math>(1-2)[NeuAc<math>\alpha</math>(2-3)Gal<math>\beta</math>(1-4)GlcNAc<math>\beta</math>(1-3)Gal<math>\beta</math>(1-4)GlcNAc<math>\beta</math>(1-6)Man<math>\alpha</math>(1-6)]-Man<math>\beta</math>(1-4)GlcNAc<math>\beta</math>(1-4)[Fuca(1-6)]GlcNAc<math>\beta</math>-(Lys-Val-Ala)Asn-Lys-Thr-NH<sub>2</sub></p>                                                                                                                                                           |  |
| 65 | <p>NeuAc<math>\alpha</math>(2-3)Gal<math>\beta</math>(1-4)GlcNAc<math>\beta</math>(1-3)Gal<math>\beta</math>(1-4)GlcNAc<math>\beta</math>(1-3)Gal<math>\beta</math>(1-4)GlcNAc<math>\beta</math>(1-2)Man<math>\alpha</math>(1-3){NeuAc<math>\alpha</math>(2-3)Gal<math>\beta</math>(1-4)GlcNAc<math>\beta</math>(1-3)Gal<math>\beta</math>(1-4)GlcNAc<math>\beta</math>(1-2)[NeuAc<math>\alpha</math>(2-3)Gal<math>\beta</math>(1-4)GlcNAc<math>\beta</math>(1-3)Gal<math>\beta</math>(1-4)GlcNAc<math>\beta</math>(1-3)Gal<math>\beta</math>(1-4)GlcNAc<math>\beta</math>(1-6)Man<math>\alpha</math>(1-6)]-Man<math>\beta</math>(1-4)GlcNAc<math>\beta</math>(1-4)[Fuca(1-6)]-GlcNAc<math>\beta</math>-(Lys-Val-Ala)Asn-Lys-Thr-NH<sub>2</sub></p>                                            |  |
| 66 | <p>Gn/3'SLN/3'SLN-TriN</p>                                                                                                                                                                                                                                                                                                                                                                                                                                                                                                                                                                                                                                                                                                                                                                     |  |
| 67 | <p>NeuAc<math>\alpha</math>(2-3)[GalNAc<math>\beta</math>(1-4)]-Gal<math>\beta</math>(1-4)GlcNAc<math>\beta</math>-ethyl-NH<sub>2</sub></p>                                                                                                                                                                                                                                                                                                                                                                                                                                                                                                                                                                                                                                                    |  |
| 68 | <p>NeuAc<math>\alpha</math>(2-3)[GalNAc<math>\beta</math>(1-4)]-Gal<math>\beta</math>(1-4)Glc<math>\beta</math>-ethyl-NH<sub>2</sub></p>                                                                                                                                                                                                                                                                                                                                                                                                                                                                                                                                                                                                                                                       |  |

|    |                                                                                                                                                                                                                                                                                                                                                                                       |  |
|----|---------------------------------------------------------------------------------------------------------------------------------------------------------------------------------------------------------------------------------------------------------------------------------------------------------------------------------------------------------------------------------------|--|
| 69 | Gal $\beta$ (1-3)GalNAc $\beta$ (1-4)[NeuAc $\alpha$ (2-3)]-Gal $\beta$ (1-4)Glc $\beta$ -ethyl-NH <sub>2</sub>                                                                                                                                                                                                                                                                       |  |
| 70 | NeuAc $\alpha$ (2-3)Gal $\beta$ (1-4)[Fuca(1-3)]-GlcNAc $\beta$ -propyl-NH <sub>2</sub>                                                                                                                                                                                                                                                                                               |  |
| 71 | NeuAc $\alpha$ (2-3)Gal $\beta$ (1-3)[Fuca(1-4)]-GlcNAc $\beta$ (1-3)Gal $\beta$ (1-4)[Fuca(1-3)]-GlcNAc $\beta$ -ethyl-NH <sub>2</sub>                                                                                                                                                                                                                                               |  |
| 72 | NeuAc $\alpha$ (2-3)Gal $\beta$ (1-4)[Fuca(1-3)]-GlcNAc $\beta$ (1-3)Gal $\beta$ (1-4)[Fuca(1-3)]-GlcNAc $\beta$ -ethyl-NH <sub>2</sub>                                                                                                                                                                                                                                               |  |
| 73 | NeuAc $\alpha$ (2-3)Gal $\beta$ (1-4)[Fuca(1-3)]-GlcNAc $\beta$ (1-3)Gal $\beta$ (1-4)[Fuca(1-3)]-GlcNAc $\beta$ (1-3)Gal $\beta$ (1-4)[Fuca(1-3)]-GlcNAc $\beta$ -ethyl-NH <sub>2</sub>                                                                                                                                                                                              |  |
| 74 | NeuAc $\alpha$ (2-3)Gal $\beta$ (1-4)[Fuca(1-3)]-GlcNAc $\beta$ (1-3)Gal $\beta$ (1-4)[Fuca(1-3)]-GlcNAc $\beta$ (1-3)Gal $\beta$ (1-4)[Fuca(1-3)]-GlcNAc $\beta$ (1-3)Gal $\beta$ (1-4)[Fuca(1-3)]-GlcNAc $\beta$ -Thr-NH <sub>2</sub>                                                                                                                                               |  |
| 75 | NeuAc $\alpha$ (2-3)Gal $\beta$ (1-4)[Fuca(1-3)]-GlcNAc $\beta$ (1-3)Gal $\beta$ (1-4)[Fuca(1-3)]-GlcNAc $\beta$ (1-3)Gal $\beta$ (1-4)[Fuca(1-3)]-GlcNAc $\beta$ -Thr-NH <sub>2</sub>                                                                                                                                                                                                |  |
| 76 | NeuAc $\alpha$ (2-3)Gal $\beta$ (1-4)[Fuca(1-3)]-GlcNAc $\beta$ (1-3)Gal $\beta$ (1-4)[Fuca(1-3)]-GlcNAc $\beta$ (1-3)Gal $\beta$ (1-4)[Fuca(1-3)]-GlcNAc $\beta$ (1-3)[NeuAc $\alpha$ (2-3)Gal $\beta$ (1-4)[Fuca(1-3)]-GlcNAc $\beta$ (1-3)Gal $\beta$ (1-4)[Fuca(1-3)]-GlcNAc $\beta$ (1-3)Gal $\beta$ (1-4)[Fuca(1-3)]-GlcNAc $\beta$ (1-6)]-GalNAc $\alpha$ -Thr-NH <sub>2</sub> |  |



|    |                                                                                                                                                                                                                                                                                 |  |
|----|---------------------------------------------------------------------------------------------------------------------------------------------------------------------------------------------------------------------------------------------------------------------------------|--|
| 77 | NeuAc $\alpha$ (2-3)Gal $\beta$ (1-4)[Fuca(1-3)]-GlcNAc $\beta$ (1-2)Man $\alpha$ (1-3)[NeuAc $\alpha$ (2-3)Gal $\beta$ (1-4)[Fuca(1-3)]-GlcNAc $\beta$ (1-2)Man $\alpha$ (1-6)]-Man $\beta$ (1-4)GlcNAc $\beta$ (1-4)GlcNAc $\beta$ -(Lys-Val-Ala)Asn-(Lys-Thr)NH <sub>2</sub> |  |
| 78 | NeuAc $\alpha$ (2-6)Gal $\beta$ (1-4)(6S)GlcNAc $\beta$ -ethyl-NH <sub>2</sub>                                                                                                                                                                                                  |  |
| 79 | NeuAc $\alpha$ (2-6)Gal $\beta$ (1-4)6-O-sulfo-GlcNAc $\beta$ -propyl-NH <sub>2</sub>                                                                                                                                                                                           |  |
| 80 | NeuAc $\alpha$ (2-6)Gal $\beta$ (1-4)Glc $\beta$ -ethyl-NH <sub>2</sub>                                                                                                                                                                                                         |  |
| 81 | NeuAc $\alpha$ (2-6)Gal $\beta$ (1-4)GlcNAc $\beta$ -ethyl-NH <sub>2</sub>                                                                                                                                                                                                      |  |
| 82 | NeuAc $\alpha$ (2-6)Gal $\beta$ (1-4)GlcNAc $\beta$ (1-3)Gal $\beta$ (1-4)GlcNAc $\beta$ -ethyl-NH <sub>2</sub>                                                                                                                                                                 |  |
| 83 | NeuAc $\alpha$ (2-6)Gal $\beta$ (1-4)GlcNAc $\beta$ (1-3)Gal $\beta$ (1-4)GlcNAc $\beta$ (1-3)Gal $\beta$ (1-4)GlcNAc $\beta$ -ethyl-NH <sub>2</sub>                                                                                                                            |  |
| 84 | NeuAc $\alpha$ (2-6)GalNAc $\beta$ (1-4)GlcNAc $\beta$ -ethyl-NH <sub>2</sub>                                                                                                                                                                                                   |  |
| 85 | NeuAc $\alpha$ (2-6)Gal $\beta$ (1-4)GlcNAc $\beta$ (1-3)Gal $\beta$ (1-3)GalNAc-Thr-NH <sub>2</sub>                                                                                                                                                                            |  |
| 86 | NeuAc $\alpha$ (2-6)Gal $\beta$ (1-4)GlcNAc $\beta$ (1-3)Gal $\beta$ (1-4)GlcNAc $\beta$ (1-3)Gal $\beta$ (1-3)GalNAc-Thr-NH <sub>2</sub>                                                                                                                                       |  |
| 87 | NeuAc $\alpha$ (2-6)Gal $\beta$ (1-4)GlcNAc $\beta$ (1-3)Gal $\beta$ (1-4)GlcNAc $\beta$ (1-3)Gal $\beta$ (1-4)GlcNAc $\beta$ (1-3)Gal $\beta$ (1-3)GalNAc-Thr-NH <sub>2</sub>                                                                                                  |  |
| 88 | NeuAc $\alpha$ (2-6)Gal $\beta$ (1-4)GlcNAc $\beta$ (1-3)Gal $\beta$ (1-4)GlcNAc $\beta$ (1-3)Gal $\beta$ (1-4)GlcNAc $\beta$ (1-3)Gal $\beta$ (1-4)GlcNAc $\beta$ (1-3)Gal $\beta$ (1-3)GalNAc-Thr-NH <sub>2</sub>                                                             |  |
| 89 | NeuAc $\alpha$ (2-6)Gal $\beta$ (1-4)GlcNAc $\beta$ (1-3)Gal $\beta$ (1-3)GalNAc-Thr-NH <sub>2</sub>                        |  |

|    |                                                                                                                                                                                                                                                                                                                                                                                                          |  |
|----|----------------------------------------------------------------------------------------------------------------------------------------------------------------------------------------------------------------------------------------------------------------------------------------------------------------------------------------------------------------------------------------------------------|--|
| 90 | NeuAc $\alpha$ (2-6)Gal $\beta$ (1-4)GlcNAc $\beta$ (1-6)[Gal $\beta$ (1-3)]-GalNAc $\alpha$ -Thr-NH <sub>2</sub>                                                                                                                                                                                                                                                                                        |  |
| 91 | NeuAc $\alpha$ (2-6)Gal $\beta$ (1-4)GlcNAc $\beta$ (1-3)Gal $\beta$ (1-4)GlcNAc $\beta$ (1-6)[Gal $\beta$ (1-3)]-GalNAc $\alpha$ -Thr-NH <sub>2</sub>                                                                                                                                                                                                                                                   |  |
| 92 | NeuAc $\alpha$ (2-6)Gal $\beta$ (1-4)GlcNAc $\beta$ (1-3)Gal $\beta$ (1-4)GlcNAc $\beta$ (1-3)Gal $\beta$ (1-4)GlcNAc $\beta$ (1-6)[Gal $\beta$ (1-3)]-GalNAc $\alpha$ -Thr-NH <sub>2</sub>                                                                                                                                                                                                              |  |
| 93 | NeuAc $\alpha$ (2-6)Gal $\beta$ (1-4)GlcNAc $\beta$ (1-3)Gal $\beta$ (1-4)GlcNAc $\beta$ (1-3)Gal $\beta$ (1-4)GlcNAc $\beta$ (1-3)Gal $\beta$ (1-4)GlcNAc $\beta$ (1-6)[Gal $\beta$ (1-3)]-GalNAc $\alpha$ -Thr-NH <sub>2</sub>                                                                                                                                                                         |  |
| 94 | NeuAc $\alpha$ (2-6)Gal $\beta$ (1-4)GlcNAc $\beta$ (1-3)Gal $\beta$ (1-4)GlcNAc $\beta$ (1-3)Gal $\beta$ (1-4)GlcNAc $\beta$ (1-3)Gal $\beta$ (1-4)GlcNAc $\beta$ (1-6)[Gal $\beta$ (1-3)]-GalNAc $\alpha$ -Thr-NH <sub>2</sub>                                                                                                                                                                         |  |
| 95 | NeuAc $\alpha$ (2-6)Gal $\beta$ (1-4)GlcNAc $\beta$ (1-3)Gal $\beta$ (1-4)GlcNAc $\beta$ (1-3)Gal $\beta$ (1-4)GlcNAc $\beta$ (1-3)Gal $\beta$ (1-4)GlcNAc $\beta$ (1-6)[NeuAc $\alpha$ (2-6)Gal $\beta$ (1-4)GlcNAc $\beta$ (1-3)Gal $\beta$ (1-4)GlcNAc $\beta$ (1-3)Gal $\beta$ (1-4)GlcNAc $\beta$ (1-3)Gal $\beta$ (1-3)]-GalNAc $\alpha$ -Thr-NH <sub>2</sub>                                      |  |
| 96 | NeuAc $\alpha$ (2-6)Gal $\beta$ (1-4)GlcNAc $\beta$ (1-3)Gal $\beta$ (1-4)GlcNAc $\beta$ (1-3)Gal $\beta$ (1-4)GlcNAc $\beta$ (1-3)Gal $\beta$ (1-4)GlcNAc $\beta$ (1-6)[NeuAc $\alpha$ (2-6)Gal $\beta$ (1-4)GlcNAc $\beta$ (1-3)Gal $\beta$ (1-4)GlcNAc $\beta$ (1-3)Gal $\beta$ (1-4)GlcNAc $\beta$ (1-3)Gal $\beta$ (1-4)GlcNAc $\beta$ (1-3)Gal $\beta$ (1-3)]-GalNAc $\alpha$ -Thr-NH <sub>2</sub> |  |
| 97 | NeuAc $\alpha$ (2-6)Gal $\beta$ (1-4)GlcNAc $\beta$ (1-3)GalNAc $\alpha$ -Thr-NH <sub>2</sub>                                                                                                                                                                                                                                                                                                            |  |
| 98 | NeuAc $\alpha$ (2-6)Gal $\beta$ (1-4)GlcNAc $\beta$ (1-3)Gal $\beta$ (1-4)GlcNAc $\beta$ (1-3)GalNAc $\alpha$ -Thr-NH <sub>2</sub>                                                                                                                                                                                                                                                                       |  |



|     |                                                                                                                                                                                                                                                                                                                                                                                                                                                                                                                 |  |
|-----|-----------------------------------------------------------------------------------------------------------------------------------------------------------------------------------------------------------------------------------------------------------------------------------------------------------------------------------------------------------------------------------------------------------------------------------------------------------------------------------------------------------------|--|
| 109 | <p>NeuAc<math>\alpha</math>(2-6)Gal<math>\beta</math>(1-4)GlcNAc<math>\beta</math>(1-3)Gal<math>\beta</math>(1-4)GlcNAc<math>\beta</math>(1-3)Gal<math>\beta</math>(1-4)GlcNAc<math>\beta</math>(1-6)[NeuAc<math>\alpha</math>(2-6)Gal<math>\beta</math>(1-4)GlcNAc<math>\beta</math>(1-3)Gal<math>\beta</math>(1-4)GlcNAc<math>\beta</math>(1-3)]Gal<math>\beta</math>(1-4)GlcNAc<math>\beta</math>-ethyl-NH<sub>2</sub></p>                                                                                   |  |
| 110 | <p>NeuAc<math>\alpha</math>(2-6)Gal<math>\beta</math>(1-3)GlcNAc<math>\beta</math>(1-3)Gal<math>\beta</math>(1-4)GlcNAc<math>\beta</math>(1-6)[NeuAc<math>\alpha</math>(2-6)Gal<math>\beta</math>(1-3)GlcNAc<math>\beta</math>(1-3)]Gal<math>\beta</math>(1-4)GlcNAc<math>\beta</math>-ethyl-NH<sub>2</sub></p>                                                                                                                                                                                                 |  |
| 111 | <p>Gal<math>\beta</math>(1-4)GlcNAc<math>\beta</math>(1-2)Man<math>\alpha</math>(1-3)[NeuAc<math>\alpha</math>(2-6)Gal<math>\beta</math>(1-4)GlcNAc<math>\beta</math>(1-2)Man<math>\alpha</math>(1-6)]-Man<math>\beta</math>(1-4)GlcNAc<math>\beta</math>(1-4)GlcNAc<math>\beta</math>-Asn-NH<sub>2</sub></p>                                                                                                                                                                                                   |  |
| 112 | <p>NeuAc<math>\alpha</math>(2-6)Gal<math>\beta</math>(1-4)GlcNAc<math>\beta</math>(1-2)Man<math>\alpha</math>(1-3)[Gal<math>\beta</math>(1-4)GlcNAc<math>\beta</math>(1-2)Man<math>\alpha</math>(1-6)]-Man<math>\beta</math>(1-4)GlcNAc<math>\beta</math>(1-4)GlcNAc<math>\beta</math>-Asn-NH<sub>2</sub></p>                                                                                                                                                                                                   |  |
| 113 | <p>GlcNAc<math>\beta</math>(1-2)Man<math>\alpha</math>(1-3)[NeuAc<math>\alpha</math>(2-6)Gal<math>\beta</math>(1-4)GlcNAc<math>\beta</math>(1-2)Man<math>\alpha</math>(1-6)]-Man<math>\beta</math>(1-4)GlcNAc<math>\beta</math>(1-4)GlcNAc<math>\beta</math>-Asn-NH<sub>2</sub></p>                                                                                                                                                                                                                             |  |
| 114 | <p>NeuAc<math>\alpha</math>(2-6)Gal<math>\beta</math>(1-4)GlcNAc<math>\beta</math>(1-2)Man<math>\alpha</math>(1-3)[NeuAc<math>\alpha</math>(2-6)Gal<math>\beta</math>(1-4)GlcNAc<math>\beta</math>(1-2)Man<math>\alpha</math>(1-6)]-Man<math>\beta</math>(1-4)GlcNAc<math>\beta</math>(1-4)GlcNAc<math>\beta</math>-Asn-NH<sub>2</sub></p>                                                                                                                                                                      |  |
| 115 | <p>NeuAc<math>\alpha</math>(2-6)Gal<math>\beta</math>(1-4)GlcNAc<math>\beta</math>(1-3)Gal<math>\beta</math>(1-4)GlcNAc<math>\beta</math>(1-2)Man<math>\alpha</math>(1-3)[NeuAc<math>\alpha</math>(2-6)Gal<math>\beta</math>(1-4)GlcNAc<math>\beta</math>(1-3)Gal<math>\beta</math>(1-4)GlcNAc<math>\beta</math>(1-2)Man<math>\alpha</math>(1-6)]-Man<math>\beta</math>(1-4)GlcNAc<math>\beta</math>(1-4)GlcNAc<math>\beta</math>-Asn-NH<sub>2</sub></p>                                                        |  |
| 116 | <p>NeuAc<math>\alpha</math>(2-6)Gal<math>\beta</math>(1-4)GlcNAc<math>\beta</math>(1-3)Gal<math>\beta</math>(1-4)GlcNAc<math>\beta</math>(1-2)Man<math>\alpha</math>(1-3)[NeuAc<math>\alpha</math>(2-6)Gal<math>\beta</math>(1-4)GlcNAc<math>\beta</math>(1-3)Gal<math>\beta</math>(1-4)GlcNAc<math>\beta</math>(1-2)Man<math>\alpha</math>(1-6)]-Man<math>\beta</math>(1-4)GlcNAc<math>\beta</math>(1-4)GlcNAc<math>\beta</math>-(Lys-Val-Ala)Asn-Lys-Thr-NH<sub>2</sub></p>                                   |  |
| 117 | <p>NeuAc<math>\alpha</math>(2-6)Gal<math>\beta</math>(1-4)GlcNAc<math>\beta</math>(1-3)Gal<math>\beta</math>(1-4)GlcNAc<math>\beta</math>(1-3)Gal<math>\beta</math>(1-4)GlcNAc<math>\beta</math>(1-2)Man<math>\alpha</math>(1-3)[NeuAc<math>\alpha</math>(2-6)Gal<math>\beta</math>(1-4)GlcNAc<math>\beta</math>(1-3)Gal<math>\beta</math>(1-4)GlcNAc<math>\beta</math>(1-2)Man<math>\alpha</math>(1-6)]-Man<math>\beta</math>(1-4)GlcNAc<math>\beta</math>(1-4)GlcNAc<math>\beta</math>-Asn-NH<sub>2</sub></p> |  |



|     |                                                                                                                                                                                                                                                                                                                                                                                                                                                                                                                                                                                                                                                                                                                                                                                                                                                                                                                                                                                                                                                                                                                                                                                                                                                                                                                                                                          |  |
|-----|--------------------------------------------------------------------------------------------------------------------------------------------------------------------------------------------------------------------------------------------------------------------------------------------------------------------------------------------------------------------------------------------------------------------------------------------------------------------------------------------------------------------------------------------------------------------------------------------------------------------------------------------------------------------------------------------------------------------------------------------------------------------------------------------------------------------------------------------------------------------------------------------------------------------------------------------------------------------------------------------------------------------------------------------------------------------------------------------------------------------------------------------------------------------------------------------------------------------------------------------------------------------------------------------------------------------------------------------------------------------------|--|
| 125 | <p>NeuAc<math>\alpha</math>(2-6)Gal<math>\beta</math>(1-4)GlcNAc<math>\beta</math>(1-3)Gal<math>\beta</math>(1-4)GlcNAc<math>\beta</math>(1-2)Man<math>\alpha</math>(1-3){NeuAc<math>\alpha</math>(2-6)Gal<math>\beta</math>(1-4)GlcNAc<math>\beta</math>(1-3)Gal<math>\beta</math>(1-4)GlcNAc<math>\beta</math>(1-2)[NeuAc<math>\alpha</math>(2-6)Gal<math>\beta</math>(1-4)GlcNAc<math>\beta</math>(1-3)Gal<math>\beta</math>(1-4)GlcNAc<math>\beta</math>(1-2)]NeuAc<math>\alpha</math>(2-6)Gal<math>\beta</math>(1-4)GlcNAc<math>\beta</math>(1-3)Gal<math>\beta</math>(1-4)GlcNAc<math>\beta</math>(1-2)[NeuAc<math>\alpha</math>(2-6)Gal<math>\beta</math>(1-4)GlcNAc<math>\beta</math>(1-3)Gal<math>\beta</math>(1-4)GlcNAc<math>\beta</math>(1-2)]Fuca(1-6)}-Man<math>\beta</math>(1-4)GlcNAc<math>\beta</math>(1-4)[Fuca(1-6)]GlcNAc<math>\beta</math>-(Lys-Val-Ala)Asn-Lys-Thr-NH<sub>2</sub></p>                                                                                                                                                                                                                                                                                                                                                                                                                                                              |  |
| 126 | <p>NeuAc<math>\alpha</math>(2-6)Gal<math>\beta</math>(1-4)GlcNAc<math>\beta</math>(1-3)Gal<math>\beta</math>(1-4)GlcNAc<math>\beta</math>(1-3)Gal<math>\beta</math>(1-4)GlcNAc<math>\beta</math>(1-2)Man<math>\alpha</math>(1-3){NeuAc<math>\alpha</math>(2-6)Gal<math>\beta</math>(1-4)GlcNAc<math>\beta</math>(1-3)Gal<math>\beta</math>(1-4)GlcNAc<math>\beta</math>(1-2)[NeuAc<math>\alpha</math>(2-6)Gal<math>\beta</math>(1-4)GlcNAc<math>\beta</math>(1-3)Gal<math>\beta</math>(1-4)GlcNAc<math>\beta</math>(1-2)]NeuAc<math>\alpha</math>(2-6)Gal<math>\beta</math>(1-4)GlcNAc<math>\beta</math>(1-3)Gal<math>\beta</math>(1-4)GlcNAc<math>\beta</math>(1-2)[NeuAc<math>\alpha</math>(2-6)Gal<math>\beta</math>(1-4)GlcNAc<math>\beta</math>(1-3)Gal<math>\beta</math>(1-4)GlcNAc<math>\beta</math>(1-2)]NeuAc<math>\alpha</math>(2-6)Gal<math>\beta</math>(1-4)GlcNAc<math>\beta</math>(1-3)Gal<math>\beta</math>(1-4)GlcNAc<math>\beta</math>(1-2)[NeuAc<math>\alpha</math>(2-6)Gal<math>\beta</math>(1-4)GlcNAc<math>\beta</math>(1-3)Gal<math>\beta</math>(1-4)GlcNAc<math>\beta</math>(1-2)]Fuca(1-6)}-GlcNAc<math>\beta</math>-(Lys-Val-Ala)Asn-Lys-Thr-NH<sub>2</sub></p>                                                                                                                                                                                 |  |
| 127 | <p>NeuAc<math>\alpha</math>(2-6)Gal<math>\beta</math>(1-4)GlcNAc<math>\beta</math>(1-3)Gal<math>\beta</math>(1-4)GlcNAc<math>\beta</math>(1-3)Gal<math>\beta</math>(1-4)GlcNAc<math>\beta</math>(1-3)Gal<math>\beta</math>(1-4)GlcNAc<math>\beta</math>(1-2)Man<math>\alpha</math>(1-3){NeuAc<math>\alpha</math>(2-6)Gal<math>\beta</math>(1-4)GlcNAc<math>\beta</math>(1-3)Gal<math>\beta</math>(1-4)GlcNAc<math>\beta</math>(1-3)Gal<math>\beta</math>(1-4)GlcNAc<math>\beta</math>(1-2)[NeuAc<math>\alpha</math>(2-6)Gal<math>\beta</math>(1-4)GlcNAc<math>\beta</math>(1-3)Gal<math>\beta</math>(1-4)GlcNAc<math>\beta</math>(1-2)]NeuAc<math>\alpha</math>(2-6)Gal<math>\beta</math>(1-4)GlcNAc<math>\beta</math>(1-3)Gal<math>\beta</math>(1-4)GlcNAc<math>\beta</math>(1-2)[NeuAc<math>\alpha</math>(2-6)Gal<math>\beta</math>(1-4)GlcNAc<math>\beta</math>(1-3)Gal<math>\beta</math>(1-4)GlcNAc<math>\beta</math>(1-2)]NeuAc<math>\alpha</math>(2-6)Gal<math>\beta</math>(1-4)GlcNAc<math>\beta</math>(1-3)Gal<math>\beta</math>(1-4)GlcNAc<math>\beta</math>(1-2)[NeuAc<math>\alpha</math>(2-6)Gal<math>\beta</math>(1-4)GlcNAc<math>\beta</math>(1-3)Gal<math>\beta</math>(1-4)GlcNAc<math>\beta</math>(1-2)]Fuca(1-6)}-Man<math>\beta</math>(1-4)GlcNAc<math>\beta</math>(1-4)[Fuca(1-6)]GlcNAc<math>\beta</math>-(Lys-Val-Ala)Asn-Lys-Thr-NH<sub>2</sub></p> |  |
| 128 | LN/6'SLN/6'SLN-TriN                                                                                                                                                                                                                                                                                                                                                                                                                                                                                                                                                                                                                                                                                                                                                                                                                                                                                                                                                                                                                                                                                                                                                                                                                                                                                                                                                      |  |
| 129 | 6'SLN/LeX/LeX-TriN                                                                                                                                                                                                                                                                                                                                                                                                                                                                                                                                                                                                                                                                                                                                                                                                                                                                                                                                                                                                                                                                                                                                                                                                                                                                                                                                                       |  |
| 130 | 6'SLNLN/LeX/LeX-TriN                                                                                                                                                                                                                                                                                                                                                                                                                                                                                                                                                                                                                                                                                                                                                                                                                                                                                                                                                                                                                                                                                                                                                                                                                                                                                                                                                     |  |
